# Supplementary material
Source: MDPI journal article supplement (https://www.mdpi.com/2073-445X/11/7/1096)
Supplement: s1 [file s1 › land-1710513-supplementary.pdf]

# Erosion map reliability using a GIS and the EPM, Belgrade peri-urban area, Serbia

Nataša Veličković <sup>1\*</sup>, Mirjana Todosijević <sup>1</sup> and Desanaka Šulić <sup>2</sup>

<sup>1</sup> University in Belgrade, Faculty of Forestry; mirjana.todosijevic@sfb.bg.ac.rs

<sup>2</sup> Faculty of Ecology and Environmental Protection, University Union Nikola Tesla; dsulic@unionnikolatesla.edu.rs

\* Correspondence: pavlovic.natasa78@gmail.com; Tel.: +381637797898

## Supplementary File

Table S1. Conditions affecting the value of coefficient Y [45].

| No. | Type of Land Formations and Related Types                                                | Average Value of Y |
|-----|------------------------------------------------------------------------------------------|--------------------|
| 1.  | Sands, gravel, and unconsolidated sediments                                              | 2.00               |
| 2.  | Loess, salina soils, steppe lands, etc.                                                  | 1.60               |
| 3.  | Decaying limestone and marls                                                             | 1.20               |
| 4.  | Serpentines, red sandstones, and flysch deposits                                         | 1.10               |
| 5.  | Podzols, parapodzols, decayed shales, mica schists, gray schists, argiloshists, etc.     | 1.00               |
| 6.  | Dolomites and shale limestone, red soil (terra rossa), and ranker (humus silicate soils) | 0.90               |
| 7.  | Cambisol and mountainous lands                                                           | 0.80               |
| 8.  | Vertisol, marsh arable land, and wetlands                                                | 0.60               |
| 9.  | Chernozem and alluvial deposits of good structure                                        | 0.50               |
| 10. | Bare, compact eruptive materials                                                         | 0.25               |

Table S2. Conditions affecting the value of coefficient X [45].

| No.                                               | Atmospheric Protection of Land                      | Average Value of X |
|---------------------------------------------------|-----------------------------------------------------|--------------------|
| <b>Basin or Area Before Anti-Erosion Measures</b> |                                                     |                    |
| 1.                                                | Completely bare, uncultivated land (barren land)    | 1.00               |
| 2.                                                | Arable land with up-and-down slope cultivation      | 0.90               |
| 3.                                                | Orchards and vineyards without ground vegetation    | 0.70               |
| 4.                                                | Mountain pastures                                   | 0.60               |
| 5.                                                | Meadows, clover fields, and similar perennial crops | 0.40               |
| 6.                                                | Degraded forests and thickets with eroded land      | 0.60               |
| 7.                                                | Forests and thickets of good composition and growth | 0.05               |

Table S3. Conditions affecting the value of coefficient  $\varphi$  [45].

| No. | Visible Signs of Erosion                                             | Average Value of $\varphi$ |
|-----|----------------------------------------------------------------------|----------------------------|
| 1.  | Basin or area completely covered by gully erosion and landslide pro- | 1.00                       |

|     |                                                                                                                                                                   |      |
|-----|-------------------------------------------------------------------------------------------------------------------------------------------------------------------|------|
|     | cesses (deep erosion)                                                                                                                                             |      |
| 2.  | About 80% of a basin or an area under furrowed or gully erosion                                                                                                   | 0.90 |
| 3.  | About 50% of a basin under furrowed or gully erosion                                                                                                              | 0.80 |
| 4.  | The whole basin under surface erosion: decays and debris, a few furrows and gullies (deep erosion), as well as strong karst erosion                               | 0.70 |
| 5.  | The entire basin under surface erosion, but without visible deep erosion processes (furrows, gullies, landslides, etc.)                                           | 0.60 |
| 6.  | Land with 50% of the area covered by surface erosion while the rest of the basin is preserved                                                                     | 0.50 |
| 7.  | Land with 20% of the surface covered by surface erosion while 80% of the basin is preserved                                                                       | 0.30 |
| 8.  | Land in the basin without visible signs of erosion, but there are minor landslides in the riverbeds                                                               | 0.20 |
| 9.  | Basin without visible traces of erosion, but mostly under arable land                                                                                             | 0.15 |
| 10. | Area or basin without visible signs of erosion, both in the basin and in the riverbed, but mostly under forests or perennial vegetation (meadows, pastures, etc.) | 0.10 |

Table S4. Erosion intensity, erosion category, and range of erosion coefficient (Table 1. map No. 1).

| Erosion Intensity | Erosion Category | Range of Erosion Coefficient | Erosion Coefficient Average Value |
|-------------------|------------------|------------------------------|-----------------------------------|
| Excessive         | I <sub>1</sub>   | 1,41 to 1,50 >1,50           | 1,25                              |
|                   | I <sub>2</sub>   | 1,21 to 1,40                 |                                   |
|                   | I <sub>3</sub>   | 1,01 to 1,20                 |                                   |
| Strong            | II <sub>1</sub>  | 0,86 to 1,00                 | 0,85                              |
|                   | II <sub>2</sub>  | 0,71 to 0,85                 |                                   |
| Medium            | III <sub>1</sub> | 0,56 to 0,70                 | 0,55                              |
|                   | III <sub>2</sub> | 0,41 to 0,55                 |                                   |
| Weak              | IV <sub>1</sub>  | 0,31 to 0,40                 | 0,30                              |
|                   | IV <sub>2</sub>  | 0,21 to 0,30                 |                                   |
| Very weak         | V <sub>1</sub>   | 0,11 to 0,20                 | 0,15                              |
|                   | V <sub>2</sub>   | 0,01 to 0,10                 |                                   |
| Accumulation      |                  |                              |                                   |

Tables S1–S4 are designed on the basis of field and laboratory research of the experts on torrential waters and erosion in Serbia.
